# Supplementary material for: Erythrocyte membrane affinity chromatography, solid-phase extraction and UPLC-QTOF-MS/MS to screen active ingredients of Buyang Huanwu decoction
Source: Royal Society of Chemistry journal article supplement (doi:10.1039/c9ra03447a), 2019-01-01
Supplement: c9ra03447a1.pdf [file c9ra03447a1.pdf]

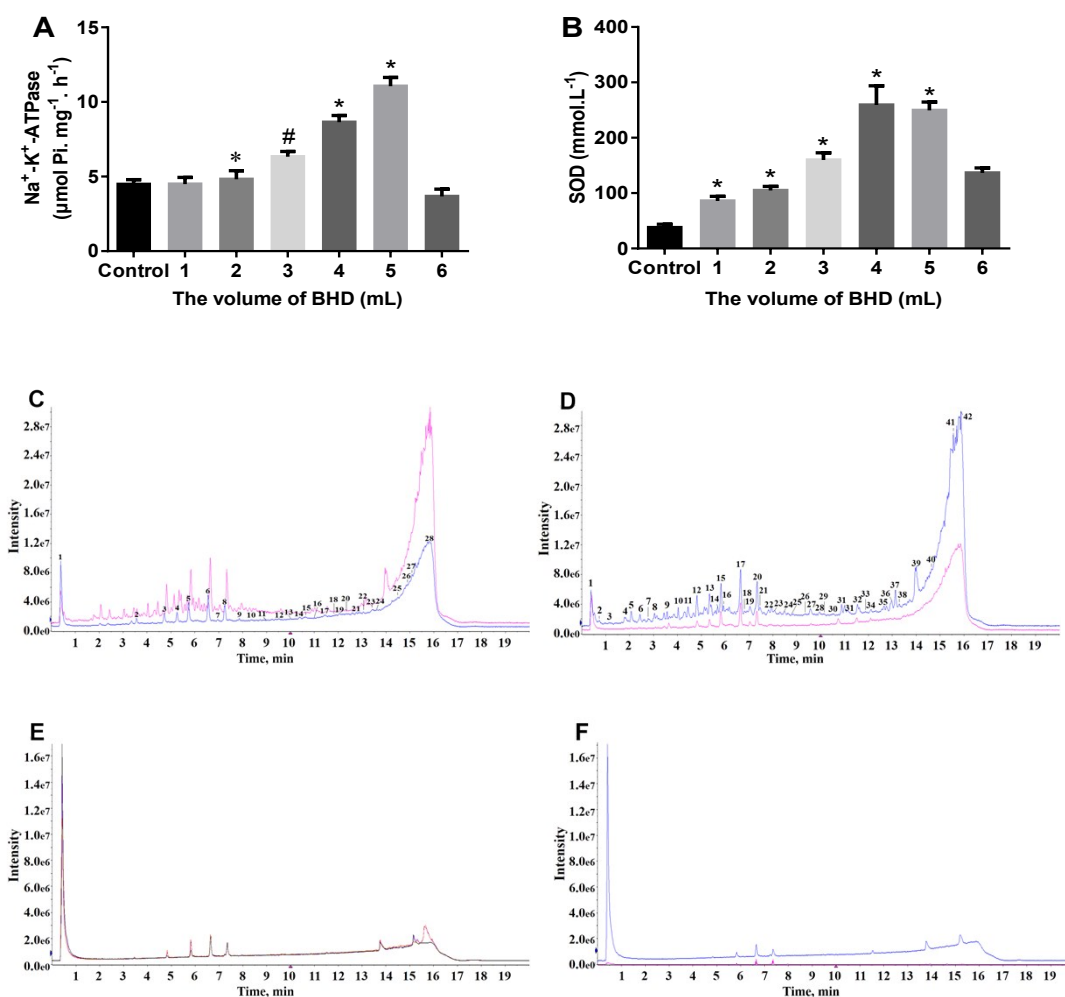

Fig.S1 Images of different solution. (A) Effects of different volume of BHD on Na<sup>+</sup>-K<sup>+</sup>-ATPase, \**P* < 0.05, #*P* < 0.01, \**P* < 0.001 compared with the control group. (B) Effects of different volume of BHD on SOD, \**P* < 0.05, #*P* < 0.01, \**P* < 0.001 compared with the control group. (C) Dissociation solution of 4 ml BHD incubating with erythrocyte membrane. (D) Dissociation solution of 5 ml BHD incubating with erythrocyte membrane. (E) The third, fourth and fifth washing solution of erythrocyte membrane after incubating with BHD. (F) Blank samples.

Table S1 Effects of the four identified compounds on Na<sup>+</sup>-K<sup>+</sup>-ATPase, SA, SOD and CHO (n=3)

| Groups       | c<br>(μg • mL <sup>-1</sup> ) | Na <sup>+</sup> -K <sup>+</sup> -ATPase<br>(μmol Pi • mg <sup>-1</sup> • h <sup>-1</sup> ) | SA<br>(mmol • L <sup>-1</sup> ) | SOD<br>(U • mL <sup>-1</sup> ) | CHO<br>(mmol • L <sup>-1</sup> ) |
|--------------|-------------------------------|--------------------------------------------------------------------------------------------|---------------------------------|--------------------------------|----------------------------------|
| Control      |                               | 2.98±0.39                                                                                  | 9.04±0.85                       | 38.39±2.33                     | 22.67±2.89                       |
| Calycosin    | 0.1                           | 1.55±0.2                                                                                   | 12.05±0.42                      | 64.69±4.05                     | 14.39±1.47                       |
|              | 0.5                           | 1.86±0.24                                                                                  | 23.20±0.98                      | 107.58±6.62                    | 12.26±1.06                       |
|              | 1.0                           | 4.93±0.42                                                                                  | 28.38±0.98                      | 74.23±1.84                     | 4.48±0.41                        |
|              | 10.0                          | 0.86±0.10                                                                                  | 15.99±0.69                      | 64.44±3.74                     | 15.36±2.34                       |
|              | 0.1                           | 2.75±0.47                                                                                  | 23.23±1.53                      | 34.58±3.65                     | 20.14±1.96                       |
| Paeoniflorin | 0.5                           | 11.10±0.84                                                                                 | 19.76±0.96                      | 28.57±4.50                     | 21.56±1.66                       |
|              | 1.0                           | 3.43±0.32                                                                                  | 18.36±0.89                      | 122.39±11.29                   | 21.34±1.28                       |

|                                              |      |           |            |              |            |
|----------------------------------------------|------|-----------|------------|--------------|------------|
|                                              | 10.0 | 1.36±0.21 | 11.79±0.48 | 47.81±3.94   | 14.49±0.84 |
| 6-hydroxy behenyl-<br>3,6-di-O-<br>glucoside | 0.1  | 3.19±0.51 | 20.57±1.25 | 33.57±2.15   | 15.44±1.25 |
|                                              | 0.5  | 2.54±0.42 | 21.50±1.11 | 93.08±2.90   | 12.66±1.29 |
|                                              | 1.0  | 1.38±0.51 | 17.18±0.96 | 181.43±7.47  | 12.21±1.69 |
|                                              | 10.0 | 0.23±0.10 | 15.95±0.93 | 64.78±4.76   | 23.36±1.5  |
| Calycosin-7-O-β-D-<br>glucoside              | 0.1  | 2.28±0.33 | 12.22±0.90 | 83.48±6.06   | 16.70±1.77 |
|                                              | 0.5  | 1.47±0.28 | 24.08±1.38 | 212.72±4.45  | 17.56±0.76 |
|                                              | 1.0  | 3.66±0.34 | 41.81±1.58 | 213.60±2.48  | 17.51±1.12 |
|                                              | 10.0 | 1.71±0.50 | 1.35±0.45  | 219.06±10.22 | 23.73±2.67 |

---
